# Supplementary material
Source: PubMed Central journal article supplement (PMC1951777)
Supplement: mbc_E07-02-0164_1.pdf [file mbc_E07-02-0164_1.pdf]

## Supporting material

### Supplementary figure legends

**Supplementary Figure 1.** Functional complementation of Pcp1 by the human mitochondrial rhomboid protease PARL. Wild type (WT) or  $\Delta pcp1$  ( $\Delta$ ) spores expressing either the human (*PARL*) or the yeast (*PCP1*) mitochondrial rhomboid protease were used. Growth of indicated strains was tested by drop dilutions on rich media containing indicated carbon sources.

### Supporting tables

**Supplementary Table 1.** Plasmids used in this study.

| Name                                                                          | Description                                                      | Vector                             | Reference                      |
|-------------------------------------------------------------------------------|------------------------------------------------------------------|------------------------------------|--------------------------------|
| pYES2-OPA1 (URA3)                                                             | OPA1 cDNA expression constructs for splice variants 4, 7 or 8    | pYES2 (Invitrogen)                 | this study                     |
| pYES2-OPA1 ( <i>ura3::TRP1</i> )                                              | OPA1 cDNA expression constructs for splice variants 4, 7 or 8    | pYES2 (Invitrogen)                 | this study                     |
| pCAG-OPA1-SP7-IRES-mDsRed                                                     | OPA1 splice variant 7 cDNA for overexpression in mammalian cells | pCAG-IRES                          | this study                     |
| pES425-PARL                                                                   | PARL cDNA expression construct                                   | pES425#1 (Doron Rapaport)          | this study                     |
| pYES2-Pcp1                                                                    | Pcp1 expression construct                                        | pYES2 (Invitrogen)                 | this study                     |
| pVT100U-mtGFP                                                                 | Fluorescence microscopy                                          | pVT100U                            | (Westermann and Neupert, 2000) |
| pRS314 <sup>ADHI</sup> -Yta10 (1-61)-hAFG3L2 (36-798)-Myc                     | expression construct for human AFG3L2                            | pRS314 (Sikorski and Hieter, 1989) | this study                     |
| Yeplac111 <sup>ADHI</sup> -Yta10 (1-63)-hparaplegin (59-795)-HA,              | expression construct for human paraplegin                        | Yeplac111 (Gietz and Sugino, 1988) | (Atorino <i>et al.</i> , 2003) |
| Yeplac112 <sup>ADHI</sup> -Yta10 (1-61)-hAFG3L2 (36-798)-Myc                  | expression construct for human AFG3L2                            | Yeplac112 (Gietz and Sugino, 1988) | (Koppen <i>et al.</i> , 2007)  |
| Yeplac112 <sup>ADHI</sup> -Yta10 (1-61)-hAFG3L2 <sup>E575Q</sup> (36-798)-Myc | expression construct for proteolytically inactive hAFG3L2        | Yeplac112 (Gietz and Sugino, 1988) | (Koppen <i>et al.</i> , 2007)  |
| Yeplac181 <sup>YTA10</sup> -Yta10 (1-61)-paraplegin (44-781)                  | expression construct for murine paraplegin                       | Yeplac181 (Gietz and Sugino, 1988) | (Nolden <i>et al.</i> , 2005)  |
| Yeplac181 <sup>YTA10</sup> -Yta10 (1-61)-paraplegin <sup>E575Q</sup> (44-781) | expression construct for proteolytically inactive paraplegin     | Yeplac181 (Gietz and Sugino, 1988) | (Koppen <i>et al.</i> , 2007)  |
| Yeplac195 <sup>YTA10</sup> -Yta10 (1-61)-Afg31I (25-789)-Myc                  | expression construct for murine Afg31I                           | Yeplac195(Gietz and Sugino, 1988)  | (Koppen <i>et al.</i> , 2007)  |
| Yeplac195 <sup>YTA10</sup> -Yta10 (1-61)-Afg31I <sup>E567Q</sup> (25-789)-Myc | expression construct for proteolytically inactive Afg31I         | Yeplac195 (Gietz and Sugino, 1988) | (Koppen <i>et al.</i> , 2007)  |
| Yeplac112 <sup>YTA10</sup> -Yta10 (1-61)-Afg312 (36-802)-HA                   | expression construct for murine Afg312                           | Yeplac112 (Gietz and Sugino, 1988) | (Nolden <i>et al.</i> , 2005)  |
| Yeplac112 <sup>YTA10</sup> -Yta10 (1-61)-Afg312 <sup>E574Q</sup> (36-802)-HA  | expression construct for proteolytically inactive Afg312         | Yeplac112(Gietz and Sugino, 1988)  | (Koppen <i>et al.</i> , 2007)  |

**Supplementary Table 2.** Strains. The following strains were transformed with plasmids encoding OPA1 splice variants as indicated in the text and figures.

| Description                                                         | Name   | Background                 | Plasmids                                                                                                                                                     | Reference                      |
|---------------------------------------------------------------------|--------|----------------------------|--------------------------------------------------------------------------------------------------------------------------------------------------------------|--------------------------------|
| WT                                                                  |        | W303a                      |                                                                                                                                                              | (Rothstein and Sherman, 1980)  |
| <i>PCP1/Δpcp1</i>                                                   |        | W303a                      |                                                                                                                                                              | Euroscarf acc. No. Y24731      |
| <i>Δpcp1 + PCP1</i>                                                 | YKO100 | spore of <i>PCP1/Δpcp1</i> | pYES2-Pcp1                                                                                                                                                   | this study                     |
| <i>PCP1</i>                                                         | YKO100 | spore of <i>PCP1/Δpcp1</i> |                                                                                                                                                              | this study                     |
| <i>Δpcp1 + PARL</i>                                                 | YKO100 | spore of <i>PCP1/Δpcp1</i> | pES425-PARL                                                                                                                                                  | this study                     |
| <i>Δpcp1</i>                                                        | YKO100 | spore of <i>PCP1/Δpcp1</i> |                                                                                                                                                              | this study                     |
| <i>Ayta10Ayta12</i>                                                 | YKO100 | W303a                      |                                                                                                                                                              | (Atorino <i>et al.</i> , 2003) |
| <i>Ayta10Ayta12+ PARL</i>                                           | YKO100 | YKO100                     | pES425-PARL                                                                                                                                                  | this study                     |
| <i>Ayta10Ayta12 + hAFG3L2 + hparaplegin(LEU2)</i>                   | YKO117 | W303a                      | Yeplac111 <sup>ADH1</sup> -Yta10 (1-63)-hparaplegin (59-795)-HA, pRS316 <sup>ADH1</sup> -Yta10 (1-61)-hAFG3L2 (36-798)-Myc                                   | (Atorino <i>et al.</i> , 2003) |
| <i>Ayta10Ayta12 + hAFG3L2 + hparaplegin(TRP1)</i>                   | YKO117 | YKO117                     | Yeplac111 <sup>ADH1</sup> -Yta10 (1-63)-hparaplegin (59-795)-HA, pRS314 <sup>ADH1</sup> -Yta10 (1-61)-hAFG3L2 (36-798)-Myc                                   | this study                     |
| <i>Ayta10Ayta12</i>                                                 | YKO200 | W303a                      |                                                                                                                                                              | (Koppen <i>et al.</i> , 2007)  |
| <i>Ayta10Ayta12 + hAFG3L2</i>                                       | YKO203 | YKO200                     | Yeplac112 <sup>ADH1</sup> -Yta10 (1-61)-hAFG3L2 (36-798)-Myc                                                                                                 | (Koppen <i>et al.</i> , 2007)  |
| <i>Ayta10Ayta12 + hAFG3L2<sup>EQ</sup></i>                          | YKO204 | YKO200                     | Yeplac112 <sup>ADH1</sup> -Yta10 (1-61)-hAFG3L2 <sup>E575Q</sup> (36-798)-Myc                                                                                | (Koppen <i>et al.</i> , 2007)  |
| <i>Ayta10Ayta12 + paraplegin</i>                                    | YKO209 | YKO200                     | Yeplac181 <sup>YTA10</sup> -Yta10 (1-61)-paraplegin (44-781)                                                                                                 | (Koppen <i>et al.</i> , 2007)  |
| <i>Ayta10Ayta12 + Afg311</i>                                        | YKO211 | YKO200                     | Yeplac195 <sup>YTA10</sup> -Yta10 (1-61)-Afg311 (25-789)-Myc                                                                                                 | (Koppen <i>et al.</i> , 2007)  |
| <i>Ayta10Ayta12 + Afg311<sup>EQ</sup></i>                           | YKO212 | YKO200                     | Yeplac195 <sup>YTA10</sup> -Yta10 (1-61)-Afg311 <sup>E567Q</sup> (25-789)-Myc                                                                                | (Koppen <i>et al.</i> , 2007)  |
| <i>Ayta10Ayta12 + Afg312</i>                                        | YKO213 | YKO200                     | Yeplac112 <sup>YTA10</sup> -Yta10 (1-61)-Afg312 (36-802)-HA                                                                                                  | (Koppen <i>et al.</i> , 2007)  |
| <i>Ayta10Ayta12 + Afg312<sup>EQ</sup></i>                           | YKO214 | YKO200                     | Yeplac112 <sup>YTA10</sup> -Yta10 (1-61)-Afg312 <sup>E574Q</sup> (36-802)-HA                                                                                 | (Koppen <i>et al.</i> , 2007)  |
| <i>Ayta10Ayta12 + paraplegin + Afg311<sup>EQ</sup></i>              | YKO217 | YKO200                     | Yeplac181 <sup>YTA10</sup> -Yta10 (1-61)-paraplegin (44-781), Yeplac195 <sup>YTA10</sup> -Yta10 (1-61)-Afg311 <sup>E567Q</sup> (25-789)-Myc                  | (Koppen <i>et al.</i> , 2007)  |
| <i>Ayta10Ayta12 + paraplegin<sup>EQ</sup> + Afg311<sup>EQ</sup></i> | YKO218 | YKO200                     | Yeplac181 <sup>YTA10</sup> -Yta10 (1-61)-paraplegin <sup>E575Q</sup> (44-781), Yeplac195 <sup>YTA10</sup> -Yta10 (1-61)-Afg311 <sup>E567Q</sup> (25-789)-Myc | (Koppen <i>et al.</i> , 2007)  |
| <i>Ayta10Ayta12 + paraplegin + Afg312<sup>EQ</sup></i>              | YKO221 | YKO200                     | Yeplac181 <sup>YTA10</sup> -Yta10 (1-61)-paraplegin (44-781), Yeplac112 <sup>YTA10</sup> -Yta10 (1-61)-Afg312 <sup>E574Q</sup> (36-802)-HA                   | (Koppen <i>et al.</i> , 2007)  |
| <i>Ayta10Ayta12 + paraplegin<sup>EQ</sup> + Afg312<sup>EQ</sup></i> | YKO222 | YKO200                     | Yeplac181 <sup>YTA10</sup> -Yta10 (1-61)-paraplegin <sup>E575Q</sup> (44-781), Yeplac112 <sup>YTA10</sup> -Yta10 (1-61)-Afg312 <sup>E574Q</sup> (36-802)-HA  | (Koppen <i>et al.</i> , 2007)  |

## References

- Atorino, L., Silvestri, L., Koppen, M., Cassina, L., Ballabio, A., Marconi, R., Langer, T., and Casari, G. (2003). Loss of m-AAA protease in mitochondria causes complex I deficiency and increased sensitivity to oxidative stress in hereditary spastic paraplegia. *J Cell Biol* 163, 777-787.
- Gietz, R.D., and Sugino, A. (1988). New yeast-Escherichia coli shuttle vectors constructed with in vitro mutagenized yeast genes lacking six-base pair restriction sites. *Gene* 74, 527-534.
- Koppen, M., Metodiev, M.D., Casari, G., Rugarli, E.I., and Langer, T. (2007). Variable and tissue-specific subunit composition of mitochondrial m-AAA protease complexes linked to hereditary spastic paraplegia. *Mol. Cell. Biol.* *in press*.
- Nolden, M., Ehses, S., Koppen, M., Bernacchia, A., Rugarli, E.I., and Langer, T. (2005). The m-AAA protease defective in hereditary spastic paraplegia controls ribosome assembly in mitochondria. *Cell* 123, 277-289.
- Rothstein, R.J., and Sherman, F. (1980). Genes affecting the expression of cytochrome c in yeast: genetic mapping and genetic interactions. *Genetics* 94, 871-889.
- Sikorski, R.S., and Hieter, P. (1989). A system of shuttle vectors and yeast host strains designed for efficient manipulation of DNA in *Saccharomyces cerevisiae*. *Genetics* 122, 19-27.
- Westermann, B., and Neupert, W. (2000). Mitochondria-targeted green fluorescent proteins: convenient tools for the study of organelle biogenesis in *Saccharomyces cerevisiae*. *Yeast* 16, 1421-1427.
