# Supplementary material
Source: PubMed Central journal article supplement (PMC1951777)

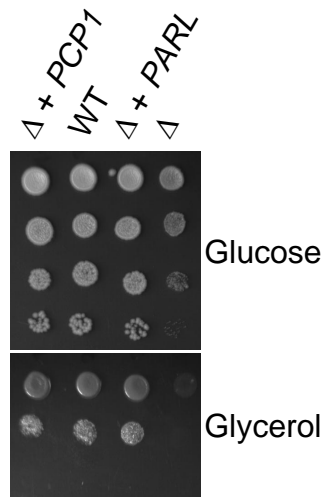

**Supplementary Figure 1 Duvezin-Koppen-Wagener 2007**

Supplement: mbc_E07-02-0164_2.pdf [file mbc_E07-02-0164_2.pdf]
